# Supplementary material for: Daphnia stressor database: Taking advantage of a decade of Daphnia ‘-omics’ data for gene annotation
Source: Springer Nature journal article supplement (doi:10.1038/s41598-019-47226-0), 2019-07-31
Supplement: 41598_2019_47226_MOESM1_ESM.pdf [file 41598_2019_47226_MOESM1_ESM.pdf]

*Daphnia* stressor database: Taking advantage of a decade of *Daphnia* '-omics' data for gene annotation

Suda Parimala Ravindran<sup>1</sup>, Jennifer Lüneburg<sup>2</sup>, Lisa Gottschlich<sup>2</sup>, Verena Tams<sup>3</sup> and Mathilde Cordellier<sup>2,\*</sup>

1 Department of Marine Sciences, Tjärnö Marine Laboratory, University of Gothenburg, 452 96, Strömstad, Sweden.

2 Universität Hamburg, Institute of Zoology, Martin-Luther-King Platz 3, 20146, Hamburg, Germany.

3 Universität Hamburg, Institut für marine Ökosystem- und Fischereiwissenschaften, Große Elbstraße 133, 22767, Hamburg, Germany.

Supporting information File 1:

Table S1: List of gene expression studies in *Daphnia*, authors of the paper, year of publication, stressors used, species, experimental technique used in the study.

| Title                                                                                                                                                                                       | Authors                                                                                                                                                                                                                                                                              | Publication | Technique used                 | Species                                              | Stressor(s) used in the study                                                                                                                            |
|---------------------------------------------------------------------------------------------------------------------------------------------------------------------------------------------|--------------------------------------------------------------------------------------------------------------------------------------------------------------------------------------------------------------------------------------------------------------------------------------|-------------|--------------------------------|------------------------------------------------------|----------------------------------------------------------------------------------------------------------------------------------------------------------|
| Acclimatory responses of the <i>Daphnia pulex</i> proteome to environmental changes. II. Chronic exposure to different temperatures (10 and 20 degrees C) mainly affects protein metabolism | Schwerin, S., Zeis, B., Lamkemeyer, T., Paul, R. J., Koch, M., Madlung, J., Fladerer, C. and Pirow, R.                                                                                                                                                                               | 2009        | Protein 2D-Gel Electrophoresis | <i>Daphnia pulex</i>                                 | Temperature                                                                                                                                              |
| Adjustments of serine proteases of <i>Daphnia pulex</i> in response to temperature changes                                                                                                  | Dolling, R., Becker, D., Hawat, S., Koch, M., Schwarzenberger, A. and Zeis, B.                                                                                                                                                                                                       | 2016        | qPCR                           | <i>Daphnia pulex</i>                                 | temperature                                                                                                                                              |
| Assessment of chemical mixtures and groundwater effects on <i>Daphnia magna</i> transcriptomics                                                                                             | Garcia-Reyero, N., Escalon, B. L., Loh, P. R., Laird, J. G., Kennedy, A. J., Berger, B. and Perkins, E. J.                                                                                                                                                                           | 2012        | qPCR, microarray               | <i>Daphnia magna</i>                                 | RDX; 2; 6-DNT; Tri Nitro Benzene; MIX-1; MIX-3; MIX-4; MIX-5; MIX-6; MIX-7; MIX-8; LAAP-85; LAAP-108; Tri Nitro Toluene; 2; 4-DNT; Dinitrobenzene; MIX-2 |
| Biomarker Discovery and Transcriptomic Responses in <i>Daphnia magna</i> exposed to Munitions Constituents                                                                                  | Garcia-Reyero, N., Poynton, H., Kennedy, A., Guan, X., Escalon, B., Chang, B., Varshavsky, J., Loguinov, A., Vulpe, C. and Perkins, E. J.                                                                                                                                            | 2009        | microarray                     | <i>Daphnia magna</i>                                 | Tri Nitro Benzene; Copper; Zinc; WO4; 4-ADNT; Lead; RDX; 2-ADNT; 2; 4-DNT; Dinitrobenzene; Tri Nitro Toluene; 2; 6-DNT                                   |
| Can metal stress induce transferable changes in gene transcription in <i>Daphnia magna</i> ?                                                                                                | Vandeghechuchte, M. B., Vandenbrouck, T., De Coninck, D., De Coen, W. M. and Janssen, C. R.                                                                                                                                                                                          | 2010        | microarray                     | <i>Daphnia magna</i>                                 | Zinc                                                                                                                                                     |
| Candidate innate immune system gene expression in the ecological model <i>Daphnia</i>                                                                                                       | Decaestecker, E., Labbe, P., Ellegaard, K., Allen, J. E. and Little, T. J.                                                                                                                                                                                                           | 2011        | qPCR                           | <i>Daphnia magna</i>                                 | <i>Pasteuria ramosa</i>                                                                                                                                  |
| Chronic toxicity evaluation of the flame retardant tris (2-butoxyethyl) phosphate (TBOEP) using <i>Daphnia magna</i> transcriptomic response                                                | Giraudou, M., Douville, M. and Houde, M.                                                                                                                                                                                                                                             | 2015        | microarray                     | <i>Daphnia magna</i>                                 | Tris (2-butoxyethyl) phosphate (TBOEP)                                                                                                                   |
| Cloning, expression and localization of DacaCSP2 and DacaCSP3 during different reproductive stages in <i>Daphnia carinata</i>                                                               | Li, H., Yang, Y., Xu, G., Wu, D., Lv, W., Jiang, Q. and Zhao, Y.                                                                                                                                                                                                                     | 2016        | qPCR                           | <i>Daphnia carinata</i>                              | Reproductive stages; Temperature                                                                                                                         |
| Cloning, expression and localization of the <i>Daphnia carinata</i> transformer gene DcarTra during different reproductive stages                                                           | Kong, L., Lv, W., Huang, Y., Liu, Z., Yang, Y. and Zhao, Y.                                                                                                                                                                                                                          | 2015        | qPCR                           | <i>Daphnia carinata</i>                              | Reproductive stages                                                                                                                                      |
| Comparative ovarian microarray analysis of juvenile hormone-responsive genes in water flea <i>Daphnia magna</i> : potential targets for toxicity                                            | Toyota, K., Williams, T. D., Sato, T., Tatarazako, N. and Iguchi, T.                                                                                                                                                                                                                 | 2017        | microarray                     | <i>Daphnia magna</i>                                 | Fenoxycarb; methyl farnesoate                                                                                                                            |
| Conserved Transcription Factors Steer Growth-Related Genomic Programs in <i>Daphnia</i>                                                                                                     | Spanier, K. I., Jansen, M., Decaestecker, E., Hulselmans, G., Becker, D., Colbourne, J. K., Orsini, L., De Meester, L. and Aerts, S.                                                                                                                                                 | 2017        | RNA-Seq                        | <i>Daphnia pulex</i>                                 | Temperature                                                                                                                                              |
| Conserved transcriptional responses to cyanobacterial stressors are mediated by alternate regulation of paralogous genes in <i>Daphnia</i>                                                  | Asselman, J., Pfrender, M. E., Lopez, J. A., De Coninck, D. I., Janssen, C. R., Shaw, J. R. and De Schampelaere, K. A.                                                                                                                                                               | 2015        | microarray                     | <i>Daphnia pulex</i>                                 | Cyanobacteria                                                                                                                                            |
| Core chemistry influences the toxicity of multicomponent metal oxide nanomaterials, lithium nickel manganese cobalt oxide, and lithium cobalt oxide to <i>Daphnia magna</i>                 | Bozich, J., Hang, M., Hamers, R. and Klaper, R.                                                                                                                                                                                                                                      | 2017        | qPCR                           | <i>Daphnia magna</i>                                 | Lithium cobalt oxide; Lithium nickel manganese cobalt oxide                                                                                              |
| <i>Daphnia magna</i> and ecotoxicogenomics: gene expression profiles of the anti-ecdysteroidal fungicide fenarimol using energy-, molting- and life stage-related cDNA libraries            | Soetaert, A., van der Ven, K., Moens, L. N., Vandenbrouck, T., van Remortel, P. and De Coen, W. M.                                                                                                                                                                                   | 2007        | microarray                     | <i>Daphnia magna</i>                                 | Fenarimol                                                                                                                                                |
| <i>Daphnia magna</i> Ecotoxicogenomics Provides Mechanistic Insights into Metal Toxicity                                                                                                    | Poynton, H. C., Varshavsky, J. R., Chang, B., Cavigliolo, G., Chan, S., Holman, P. S., Loguinov, A. V., Bauer, D. J., Komachi, K., Theil, E. C., Perkins, E. J., Hughes, O. and Vulpe, C. D.                                                                                         | 2007        | microarray                     | <i>Daphnia magna</i>                                 | Cadmium; Copper; Zinc                                                                                                                                    |
| Deciphering mechanisms of malathion toxicity under pulse exposure of the freshwater cladoceran <i>Daphnia magna</i>                                                                         | Trac, L. N., Andersen, O. and Palmqvist, A.                                                                                                                                                                                                                                          | 2016        | qPCR                           | <i>Daphnia magna</i>                                 | malathion                                                                                                                                                |
| Deciphering the genetic basis of microcystin tolerance                                                                                                                                      | Schwarzenberger, A., Sadler, T., Motameny, S., Ben-Khalifa, K., Frommolt, P., Altmüller, J., Konrad, K. and von Elert, E.                                                                                                                                                            | 2014        | RNA-Seq                        | <i>Daphnia magna</i>                                 | <i>Chlamydomonas</i> ; Microcystin                                                                                                                       |
| Diet quality determines lipase gene expression and lipase/esterase activity in <i>Daphnia pulex</i>                                                                                         | Koussoroplis, A. M., Schwarzenberger, A. and Wacker, A.                                                                                                                                                                                                                              | 2017        | qPCR                           | <i>Daphnia pulex</i>                                 | <i>Synechococcus elongatus</i>                                                                                                                           |
| Differential transcriptomic responses of ancient and modern <i>Daphnia</i> genotypes to phosphorus supply                                                                                   | Roy Chowdhury, P., Frisch, D., Becker, D., Lopez, J. A., Weider, L. J., Colbourne, J. K. and Jeyasingh, P. D.                                                                                                                                                                        | 2015        | microarray                     | <i>Daphnia pulex</i>                                 | Phosphorus                                                                                                                                               |
| Distinct expression profiles of stress defense and DNA repair genes in <i>Daphnia pulex</i> exposed to cadmium, zinc, and quantum dots                                                      | Tang, S., Wu, Y., Ryan, C. N., Yu, S., Qin, G., Edwards, D. S. and Mayer, G. D.                                                                                                                                                                                                      | 2015        | qPCR                           | <i>Daphnia pulex</i>                                 | Cadmium; zinc; quantum dots                                                                                                                              |
| Early transcriptional response pathways in <i>Daphnia magna</i> are coordinated in networks of crustacean-specific genes                                                                    | Orsini, L., Brown, J. B., Shams Solari, O., Li, D., He, S., Podicheti, R., Stoiber, M. H., Spanier, K. I., Gilbert, D., Jansen, M., Rusch, D. B., Pfrender, M. E., Colbourne, J. K., Frilander, M. J., Kvist, J., Decaestecker, E., De Eads, B. D., Andrews, J. and Colbourne, J. K. | 2017        | RNA-Seq                        | <i>Daphnia magna</i>                                 | Cadmium; Sodium Chloride; Microcystin; carbaryl; Microcystin-free cyanobacteria; Fish Kairomones; UV; pH 5.5; Lead; crowding                             |
| Ecological genomics in <i>Daphnia</i> : stress responses and environmental sex determination                                                                                                | Eads, B. D., Andrews, J. and Colbourne, J. K.                                                                                                                                                                                                                                        | 2008        | microarray                     | <i>Daphnia magna</i> and <i>D. Methyl Farnesoate</i> |                                                                                                                                                          |

|                                                                                                                                                                                     |                                                                                                                                                                                                             |      |                      |                                     |                                                                                                                                                                  |
|-------------------------------------------------------------------------------------------------------------------------------------------------------------------------------------|-------------------------------------------------------------------------------------------------------------------------------------------------------------------------------------------------------------|------|----------------------|-------------------------------------|------------------------------------------------------------------------------------------------------------------------------------------------------------------|
| Ecotoxicogenomic approaches for understanding molecular mechanisms of environmental chemical toxicity using aquatic invertebrate, <i>Daphnia</i> model organism                     | Kim, H. J., Koedrith, P. and Seo, Y. R.                                                                                                                                                                     | 2015 | Comparative genomics | <i>Daphnia magna</i>                | Propicanazole; cadmium; copper; zinc; Ibuprofen; bisphenol-A; silver nanoparticles; Copper sulphate; Hydrogen peroxide; pentachlorophenol; $\beta$ -naphthlavone |
| Effects of charge and surface ligand properties of nanoparticles on oxidative stress and gene expression within the gut of <i>Daphnia magna</i>                                     | Dominguez, G. A., Lohse, S. E., Torelli, M. D., Murphy, C. J., Hamers, R. J., Orr, G. and Klaper, R. D.                                                                                                     | 2015 | qPCR                 | <i>Daphnia magna</i>                | Nanoparticles                                                                                                                                                    |
| Effects of environmental contaminants on hemoglobin gene expression in <i>Daphnia magna</i> : a potential biomarker for freshwater quality monitoring                               | Ha, M. H. and Choi, J.                                                                                                                                                                                      | 2009 | qPCR                 | <i>Daphnia magna</i>                | nonylphenol; bisphenol A; Benzopyrene; Chloropyrifos; Paraquat dichloride; Lead nitrate                                                                          |
| Effects of glyphosate and methidathion on the expression of the <i>Dhb</i> , <i>Vtg</i> , <i>Arnt</i> , <i>CYP4</i> and <i>CYP314</i> in <i>Daphnia magna</i>                       | Le, T. H., Lim, E. S., Lee, S. K., Choi, Y. W., Kim, Y. H. and Min, J.                                                                                                                                      | 2010 | qPCR                 | <i>Daphnia magna</i>                | glyphosate; methidathion; pesticides                                                                                                                             |
| Effects of midazolam, pentobarbital and ketamine on the mRNA expression of ion channels in a model organism <i>Daphnia pulex</i>                                                    | Dong, C., Hu, A., Ni, Y., Zuo, Y. and Li, G. H.                                                                                                                                                             | 2013 | qPCR                 | <i>Daphnia pulex</i>                | midazolam; pentobarbital; ketamine; Flumazenil                                                                                                                   |
| Endocrine-disruption potential of perfluoroethylcyclohexane sulfonate (PFECHS) in chronically exposed <i>Daphnia magna</i>                                                          | Houde, M., Douville, M., Giraudo, M., Jean, K., Lepine, M., Spencer, C. and De Silva, A. O.                                                                                                                 | 2016 | qPCR, microarray     | <i>Daphnia magna</i>                | perfluoroethylcyclohexane sulfonate (PFECHS)                                                                                                                     |
| Ethanol alters the expression of ion channel genes in <i>Daphnia pulex</i>                                                                                                          | Hu, A. M., Zhu, T., Dong, L., Luo, N. F. and Du, G. Z.                                                                                                                                                      | 2016 | qPCR                 | <i>Daphnia pulex</i>                | Ethanol                                                                                                                                                          |
| Expression and ecdysteroid responsiveness of the nuclear receptors HR3 and E75 in the crustacean <i>Daphnia magna</i>                                                               | Hannas, B. R. and LeBlanc, G. A.                                                                                                                                                                            | 2010 | qPCR                 | <i>Daphnia magna</i>                | ecdysteroids                                                                                                                                                     |
| Expression of target and reference genes in <i>Daphnia magna</i> exposed to ibuprofen                                                                                               | Heckmann, L. H., Connon, R., Hutchinson, T. H., Maund, S. J., Sibly, R. M. and Callaghan, A.                                                                                                                | 2006 | qPCR                 | <i>Daphnia magna</i>                | ibuprofen                                                                                                                                                        |
| Functional genomics of acclimation and adaptation in response to thermal stress in <i>Daphnia</i>                                                                                   | Yampolsky, L. Y., Zeng, E., Lopez, J., Williams, P. J., Dick, K. B., Colbourne, J. K. and Pfrender, M. E.                                                                                                   | 2014 | microarray           | <i>Daphnia pulex</i>                | temperature                                                                                                                                                      |
| Gene expression and activity of digestive proteases in <i>Daphnia</i> : effects of cyanobacterial protease inhibitors                                                               | Schwarzenberger, A., Zitt, A., Kroth, P., Mueller, S. and Von Elert, E.                                                                                                                                     | 2010 | qPCR                 | <i>Daphnia magna</i>                | cyanobacterial protease                                                                                                                                          |
| Gene Expression Profiling in <i>Daphnia magna</i> Part I: Concentration-Dependent Profiles Provide Support for the No Observed Transcriptional Effect Level                         | Poynton, H. C., Loguinov, A. V., Varshavsky, J. R., Chan, S., Perkins, E. J. and Vulpe, C. D.                                                                                                               | 2008 | qPCR, microarray     | <i>Daphnia magna</i>                | Copper; Cadmium; zinc                                                                                                                                            |
| Gene Expression Profiling in <i>Daphnia magna</i> , Part II: Validation of a Copper Specific Gene Expression Signature with Effluent from Two Copper Mines in California            | Poynton, H. C., Zuzow, R., Loguinov, A. V., Perkins, E. J. and Vulpe, C. D.                                                                                                                                 | 2008 | qPCR, microarray     | <i>Daphnia magna</i>                | Copper; cadmium; zinc                                                                                                                                            |
| Gene expression profiling of three different stressors in the water flea <i>Daphnia magna</i>                                                                                       | Jansen, M., Vergauwen, L., Vandenbrouck, T., Knapen, D., Dom, N., Spanier, K. I., Cielen, A. and De Meester, L.                                                                                             | 2013 | microarray           | <i>Daphnia magna</i>                | carbaryl; <i>Pasteuria ramosa</i> ; fish kairomones                                                                                                              |
| Gene expression under multiple stressors in <i>Daphnia pulex</i>                                                                                                                    | Altshuler, I.                                                                                                                                                                                               | 2012 | qPCR                 | <i>Daphnia pulex</i>                | calcium; fish kairomones                                                                                                                                         |
| Gene expression variation in duplicate lactate dehydrogenase genes: do ecological species show distinct responses?                                                                  | Cristescu, M. E., Demiri, B., Altshuler, I. and Crease, T. J.                                                                                                                                               | 2014 | qPCR                 | <i>Daphnia pulex</i> and <i>Daf</i> | temperature; oxygen                                                                                                                                              |
| Gene response of CYP360A, CYP314, and GST and whole-organism changes in <i>Daphnia magna</i> exposed to ibuprofen                                                                   | Wang, L., Peng, Y., Nie, X., Pan, B., Ku, P. and Bao, S.                                                                                                                                                    | 2016 | qPCR                 | <i>Daphnia magna</i>                | ibuprofen                                                                                                                                                        |
| Gene response profiles for <i>Daphnia pulex</i> exposed to the environmental stressor cadmium reveals novel crustacean metallothioneins                                             | Shaw, J. R., Colbourne, J. K., Davey, J. C., Glaholt, S. P., Hampton, T. H., Chen, C. Y., Folt, C. L. and Hamilton, J. W.                                                                                   | 2007 | microarray           | <i>Daphnia pulex</i>                | cadmium                                                                                                                                                          |
| Gene transcription and higher-level effects of multigenerational Zn exposure in <i>Daphnia magna</i>                                                                                | Vandegheuchte, M. B., Vandenbrouck, T., De Coninck, D., De Coen, W. M. and Janssen, C. R.                                                                                                                   | 2010 | microarray           | <i>Daphnia magna</i>                | Zinc                                                                                                                                                             |
| Gene transcription, metabolite and lipid profiling in eco-indicator <i>Daphnia magna</i> indicate diverse mechanisms of toxicity by legacy and emerging flame-retardants            | Scanlan, L. D., Loguinov, A. V., Teng, Q., Antczak, P., Dailey, K. P., Nowinski, D. T., Kornbluh, J., Lin, X. X., Lachenauer, E., Arai, A., Douglas, N. K., Falciani, F., Stapleton, H. M. and Vulpe, C. D. | 2015 | microarray           | <i>Daphnia magna</i>                | flame-retardants (FR)                                                                                                                                            |
| Gene up-regulation in response to predator kairomones in the water flea, <i>Daphnia pulex</i>                                                                                       | Miyakawa, H., Imai, M., Sugimoto, N., Ishikawa, Y., Ishikawa, A., Ishigaki, H., Okada, Y., Miyazaki, S., Koshikawa, S., Cornette, R. and Miura, T.                                                          | 2010 | RT-qPCR              | <i>Daphnia pulex</i>                | fish kairomones                                                                                                                                                  |
| Genome-wide profiling of 24 hr diel rhythmicity in the water flea, <i>Daphnia pulex</i> : network analysis reveals rhythmic gene expression and enhances functional gene annotation | Rund, S. S., Yoo, B., Alam, C., Green, T., Stephens, M. T., Zeng, E., George, G. F., Sheppard, A. D., Duffield, G. E., Milenkovic, T. and Pfrender, M. E.                                                   | 2016 | microarray           | <i>Daphnia pulex</i>                | Light Dark Cycle                                                                                                                                                 |
| Genome-wide transcription profiles reveal genotype-dependent responses of biological pathways and gene-families in <i>Daphnia</i> exposed to single and mixed stressors             | De Coninck, D. I., Asselman, J., Glaholt, S., Janssen, C. R., Colbourne, J. K., Shaw, J. R. and De Schampelaere, K. A.                                                                                      | 2014 | microarray           | <i>Daphnia pulex</i>                | Cadmium; <i>Microcystis</i>                                                                                                                                      |

|                                                                                                                                                                                                 |                                                                                                                                                                                                                 |                       |                         |                                     |
|-------------------------------------------------------------------------------------------------------------------------------------------------------------------------------------------------|-----------------------------------------------------------------------------------------------------------------------------------------------------------------------------------------------------------------|-----------------------|-------------------------|-------------------------------------|
| Genomic expression responses toward bisphenol-A toxicity in <i>Daphnia magna</i> in terms of reproductive activity                                                                              | Jeong, S. W., Lee, S. M., Yum, S. S., Iguchi, T. and Seo, Y. R.                                                                                                                                                 | 2013 microarray       | <i>Daphnia magna</i>    | Bisphenol A (BPA)                   |
| How do consumers deal with stoichiometric constraints? Lessons from functional genomics using <i>Daphnia pulex</i>                                                                              | Jeyasingh, P. D., Ragavendran, A., Paland, S., Lopez, J. A., Sterner, R. W. and Colbourne, J. K.                                                                                                                | 2011 microarray       | <i>Daphnia pulex</i>    | Phosphorous                         |
| Identification and expression analysis of a doublesex1 gene in <i>Daphnia pulex</i> during different reproductive stages                                                                        | Xu, S. L., Zhou, W., Chen, P., Zhou, J. K., Zou, X., Wang, C. L., Wang, D. L. and Zhao, Y. L.                                                                                                                   | 2014 qPCR             | <i>Daphnia pulex</i>    | Developmental Stages                |
| Induction of multixenobiotic defense mechanisms in resistant <i>Daphnia magna</i> clones as a general cellular response to stress                                                               | Jordao, R., Campos, B., Lemos, M. F., Soares, A. M., Tauler, R. and Barata, C.                                                                                                                                  | 2016 qPCR             | <i>Daphnia magna</i>    | multixenobiotic                     |
| Integration of molecular with higher-level effects of dietary zinc exposure in <i>Daphnia magna</i>                                                                                             | De Schampelaere, K. A., Vandenbrouck, T., Muysen, B. T., Soetaert, A., Blust, R., De Coen, W. and Janssen, C. R.                                                                                                | 2008 qPCR, microarray | <i>Daphnia magna</i>    | Zinc                                |
| Interactions of methyl farnesoate and related compounds with a crustacean retinoid X receptor                                                                                                   | Wang, Y. H. and LeBlanc, G. A.                                                                                                                                                                                  | 2009 Assay            | <i>Daphnia magna</i>    | methyl farnesoate                   |
| Ionotropic glutamate receptors mediate inducible defense in the water flea <i>Daphnia pulex</i>                                                                                                 | Miyakawa, H., Sato, M., Colbourne, J. K. and Iguchi, T.                                                                                                                                                         | 2015 microarray       | <i>Daphnia pulex</i>    | fish kairomones                     |
| Linking Molecular and Population Stress Responses in <i>Daphnia magna</i> exposed to cadmium                                                                                                    | Connon, R., Hooper, H. L., Sibly, R. M., Lim, F.-L., Heckmann, L.-H., Moore, D. J., Watanabe, H., Soetaert, A., Cook, K., Maund, S. J., Hutchinson, T. H., Moggs, J., Coen, W. D., Iguchi, T. and Callaghan, A. | 2008 microarray       | <i>Daphnia magna</i>    | Cadmium                             |
| Melatonin synthesis follows a daily cycle in <i>Daphnia</i>                                                                                                                                     | Schwarzenberger, A. and Wacker, A.                                                                                                                                                                              | 2015 qPCR             | <i>Daphnia pulex</i>    | Light Dark Cycle; Melatonin         |
| Metallothionein and Hsp70 trade-off against one another in <i>Daphnia magna</i> cross-tolerance to cadmium and heat stress                                                                      | Haap, T., Schwarz, S. and Kohler, H. R.                                                                                                                                                                         | 2016 qPCR             | <i>Daphnia magna</i>    | cadmium; temperature                |
| Metformin preconditioning protects <i>Daphnia pulex</i> from lethal hypoxic insult involving AMPK, HIF and mTOR signaling                                                                       | Sheng, B., Liu, J. and Li, G. H.                                                                                                                                                                                | 2012 qPCR             | <i>Daphnia pulex</i>    | Metformin                           |
| Molecular characterization of the gene checkpoint homolog 1 in <i>Daphnia carinata</i> during different reproductive phases                                                                     | Kong, L., Li, H. X., Wu, D. L., Xu, G. R., Wang, D. L. and Zhao, Y. L.                                                                                                                                          | 2016 qPCR             | <i>Daphnia carinata</i> | Developmental stages                |
| Molecular cloning and sexually dimorphic expression of DM-domain genes in <i>Daphnia magna</i>                                                                                                  | Kato, Y., Kobayashi, K., Oda, S., Colbourn, J. K., Tatarazako, N., Watanabe, H. and Iguchi, T.                                                                                                                  | 2008 qPCR             | <i>Daphnia magna</i>    | Sex organs                          |
| Molecular cloning of manganese superoxide dismutase gene in the cladoceran <i>Daphnia magna</i> : effects of microcystin, nitrite, and cadmium on gene expression profiles                      | Lyu, K., Zhu, X., Chen, R., Chen, Y. and Yang, Z.                                                                                                                                                               | 2014 qPCR             | <i>Daphnia magna</i>    | microcystin; nitrite; cadmium       |
| Molecular cloning, characterization and expression analysis of a Doublesex gene from <i>Daphnia carinata</i> (Crustacea: Cladocera) during different reproductive stages                        | Zhang, M. Q., Ma, C. A., Lv, W. W., Huang, Y. H., Wang, D. L. and Zhao, Y. L.                                                                                                                                   | 2015 qPCR             | <i>Daphnia carinata</i> | Reproductive stages                 |
| Molecular impact of juvenile hormone agonists on neonatal <i>Daphnia magna</i>                                                                                                                  | Toyota, K., Kato, Y., Miyakawa, H., Yatsu, R., Mizutani, T., Ogino, Y., Miyagawa, S., Watanabe, H., Nishide, H., Uchiyama, I., Tatarazako, N. and Iguchi, T.                                                    | 2014 microarray       | <i>Daphnia magna</i>    | methoprene; fenoxycarb; epofenonane |
| Molecular impact of propiconazole on <i>Daphnia magna</i> using a reproduction-related cDNA array                                                                                               | Soetaert, A., Moens, L. N., Van der Ven, K., Van Leemput, K., Naudts, B., Blust, R. and De Coen, W. M.                                                                                                          | 2006 microarray       | <i>Daphnia magna</i>    | propiconazole                       |
| Molecular mechanisms of tolerance to cyanobacterial protease inhibitors revealed by clonal differences in <i>Daphnia magna</i>                                                                  | Schwarzenberger, A., Kuster, C. J. and Von Elert, E.                                                                                                                                                            | 2012 qPCR             | <i>Daphnia magna</i>    | dietry trypsin inhibitor            |
| Molecular responses during cadmium-induced stress in <i>Daphnia magna</i> : integration of differential gene expression with higher-level effects                                               | Soetaert, A., Vandenbrouck, T., van der Ven, K., Maras, M., van Remortel, P., Blust, R. and De Coen, W. M.                                                                                                      | 2007 microarray       | <i>Daphnia magna</i>    | cadmium                             |
| Neverland regulates embryonic moltings through the regulation of ecdysteroid synthesis in the water flea <i>Daphnia magna</i> , and may thus act as a target for chemical disruption of molting | Sumiya, E., Ogino, Y., Toyota, K., Miyakawa, H., Miyagawa, S. and Iguchi, T.                                                                                                                                    | 2016 qPCR             | <i>Daphnia magna</i>    | ecdysteroids                        |
| Nickel and binary metal mixture responses in <i>Daphnia magna</i> : molecular fingerprints and (sub)organismal effects                                                                          | Vandenbrouck, T., Soetaert, A., van der Ven, K., Blust, R. and De Coen, W.                                                                                                                                      | 2009 microarray       | <i>Daphnia magna</i>    | Nickel; Cadmium; Lead               |
| Nickel response in function of temperature differences: effects at different levels of biological organization in <i>Daphnia magna</i>                                                          | Vandenbrouck, T., Dom, N., Novais, S., Soetaert, A., Ferreira, A. L., Loureiro, S., Soares, A. M. and De Coen, W.                                                                                               | 2011 qPCR, microarray | <i>Daphnia magna</i>    | nickel; temperature                 |
| NMDA receptor activation upstream of methyl farnesoate signaling for short day-induced male offspring production in the water flea, <i>Daphnia pulex</i>                                        | Toyota, K., Miyakawa, H., Yamaguchi, K., Shigenobu, S., Ogino, Y., Tatarazako, N., Miyagawa, S. and Iguchi, T.                                                                                                  | 2015 RNA-Seq          | <i>Daphnia pulex</i>    | Methyl farnesoate                   |

|                                                                                                                                                                                     |                                                                                                                                                                                                                                              |                       |                      |                                                                                                                                                                                                                                                                                                                                                                                                                                                                                                                                  |
|-------------------------------------------------------------------------------------------------------------------------------------------------------------------------------------|----------------------------------------------------------------------------------------------------------------------------------------------------------------------------------------------------------------------------------------------|-----------------------|----------------------|----------------------------------------------------------------------------------------------------------------------------------------------------------------------------------------------------------------------------------------------------------------------------------------------------------------------------------------------------------------------------------------------------------------------------------------------------------------------------------------------------------------------------------|
| Phenotypic plasticity in three <i>Daphnia</i> genotypes in response to predator kairomone: evidence for an involvement of chitin deacetylases                                       | Christjani, M., Fink, P. and von Elert, E.                                                                                                                                                                                                   | 2016 qPCR             | <i>Daphnia pulex</i> | Fish Kairomones                                                                                                                                                                                                                                                                                                                                                                                                                                                                                                                  |
| Population genomics of resource exploitation: insights from gene expression profiles of two <i>Daphnia</i> ecotypes fed alternate resources                                         | Dudycha, J. L., Brandon, C. S. and Deitz, K. C.                                                                                                                                                                                              | 2012 microarray       | <i>Daphnia pulex</i> | <i>Ankistrodesmus falcatus</i> ; seston                                                                                                                                                                                                                                                                                                                                                                                                                                                                                          |
| Predator-induced defences in <i>Daphnia pulex</i> : Selection and evaluation of internal reference genes for gene expression studies with real-time PCR                             | Spanier, K. I., Leese, F., Mayer, C., Colbourne, J. K., Gilbert, D., Pfrender, M. E. and Tollrian, R.                                                                                                                                        | 2010 qPCR             | <i>Daphnia pulex</i> | Fish kairomones                                                                                                                                                                                                                                                                                                                                                                                                                                                                                                                  |
| ProPhenolOxidase in <i>Daphnia magna</i> : cDNA sequencing and expression in relation to resistance to pathogens                                                                    | Labbe, P. and Little, T. J.                                                                                                                                                                                                                  | 2009 qPCR             | <i>Daphnia magna</i> | <i>Pasteuria ramosa</i>                                                                                                                                                                                                                                                                                                                                                                                                                                                                                                          |
| Quantification of differentially expressed genes in <i>Daphnia magna</i> exposed to rubber wastewater                                                                               | Jo, H. J. and Jung, J.                                                                                                                                                                                                                       | 2008 qPCR             | <i>Daphnia magna</i> | Rubber wastewater                                                                                                                                                                                                                                                                                                                                                                                                                                                                                                                |
| Regulation and dysregulation of vitellogenin mRNA accumulation in daphnids ( <i>Daphnia magna</i> )                                                                                 | Hannas, B. R., Wang, Y. H., Thomson, S., Kwon, G., Li, H. and Leblanc, G. A.                                                                                                                                                                 | 2011 qPCR             | <i>Daphnia magna</i> | Diethyl stilbestrol; 4-Nonyl phenol; Piperonyl butoxide; Cyproterone acetate; Kinoprene; Methoprene; Pyriproxyfen; Fenoxycarb; Bisphenol A; Fenarimol; Testosterone; Chloroform; Zinc (as sulfate); Pentachlorophenol; Methylene chloride; Naphthalene; Acetone; Caffeine; N; N-diethyl-meta-toluamide (DEET); Atrazine; Pyrene; Triclosan; Cadmium (as chloride); Fipronil; 20-Hydroxyecdysone; Chlordane; Dieldrin; Ponasterone A; Methyl farnesoate                                                                           |
| Sequence Conservation and Sexually Dimorphic Expression of the Ftz-F1 Gene in the Crustacean <i>Daphnia magna</i>                                                                   | Mohamad Ishak, N. S., Kato, Y., Matsuura, T. and Watanabe, H.                                                                                                                                                                                | 2016 qPCR             | <i>Daphnia pulex</i> | Fenoxycarb                                                                                                                                                                                                                                                                                                                                                                                                                                                                                                                       |
| Silver Nanowire Exposure Results in Internalization and Toxicity to <i>Daphnia magna</i>                                                                                            | Scanlan, L. D., Reed, R. B., Loguinov, A. V., Antczak, P., Tagmount, A., Aloni, S., Nowinski, D. T., Luong, P., Tran, C., Karunaratne, N., Pham, D., Lin, X. X., Falciani, F., Higgins, C. P., Ranville, J. F., Vulpe, C. D. and Gilbert, B. | 2013 microarray       | <i>Daphnia magna</i> | Silver Nanowire                                                                                                                                                                                                                                                                                                                                                                                                                                                                                                                  |
| Synergistic interactions of biotic and abiotic environmental stressors on gene expression                                                                                           | Altschuler, I., McLeod, A. M., Colbourne, J. K., Yan, N. D. and Cristescu, M. E.                                                                                                                                                             | 2015 qPCR             | <i>Daphnia pulex</i> | calcium; fish kairomones; Light Dark cycle                                                                                                                                                                                                                                                                                                                                                                                                                                                                                       |
| Systems Biology Approach Reveals a Calcium-Dependent Mechanism for Basal Toxicity in <i>Daphnia magna</i>                                                                           | Antczak, P., White, T. A., Giri, A., Michelangeli, F., Viant, M. R., Cronin, M. T., Vulpe, C. and Falciani, F.                                                                                                                               | 2015 qPCR             | <i>Daphnia magna</i> | cadmium; nickel; copper; selenium; zinc; manganese; arsenic; silver; chromium; pyriproxyfen; ponasterone A; methyl farnesoate; toxaphene; beta-estradiol; aroclor 1242; 20-hydroxyecdysone; methoxychlor; nonylphenol; permethrin; bifenthrin; ?-cyhalothrin; diazinon; parathion; chlorpyrifos; toluene; phenol; beta-benzene hexachloride; dichlorobenzene; phenanthrene; atrazine; methyl tert-butyl ether; chloroform; acrylonitrile; bis(2-ethylhexyl)phthalate; trichloroethylene; 2-chloroethyl vinyl ether; thapsigargin |
| Systems biology meets stress ecology: linking molecular and organismal stress responses in <i>Daphnia magna</i>                                                                     | Heckmann, L. H., Sibly, R. M., Connon, R., Hooper, H. L., Hutchinson, T. H., Maund, S. J., Hill, C. J., Bouetard, A. and Callaghan, A.                                                                                                       | 2008 qPCR, microarray | <i>Daphnia magna</i> | Ibuprofen                                                                                                                                                                                                                                                                                                                                                                                                                                                                                                                        |
| Target gene approaches: Gene expression in <i>Daphnia magna</i> exposed to predator-borne kairomones or to microcystin-producing and microcystin-free <i>Microcystis aeruginosa</i> | Schwarzenberger, A., Courts, C. and von Elert, E.                                                                                                                                                                                            | 2009 qPCR             | <i>Daphnia magna</i> | fish kairomones; microcystin                                                                                                                                                                                                                                                                                                                                                                                                                                                                                                     |
| Temporal Expression of the Clock Genes in the Water Flea <i>Daphnia pulex</i> (Crustacea: Cladocera)                                                                                | Bernatowicz, P. P., Kotwica-Rollinska, J., Joachimiak, E., Sikora, A., Polanska, M. A., Pijanowska, J. and Bebas, P.                                                                                                                         | 2016 qPCR             | <i>Daphnia pulex</i> | Light Dark Cycle                                                                                                                                                                                                                                                                                                                                                                                                                                                                                                                 |
| The evolution of salinity tolerance in <i>Daphnia</i> : a functional genomics approach                                                                                              | Latta, L. C., Weider, L. J., Colbourne, J. K. and Pfrender, M. E.                                                                                                                                                                            | 2012 microarray       | <i>Daphnia pulex</i> | salinity                                                                                                                                                                                                                                                                                                                                                                                                                                                                                                                         |
| The good, the bad, and the toxic: approaching hormesis in <i>Daphnia magna</i> exposed to an energetic compound                                                                     | Stanley, J. K., Perkins, E. J., Habib, T., Sims, J. G., Chappell, P., Escalon, B. L., Wilbanks, M. and Garcia-Reyero, N.                                                                                                                     | 2013 microarray       | <i>Daphnia magna</i> | Tri Nitro Toluene (TNT)                                                                                                                                                                                                                                                                                                                                                                                                                                                                                                          |
| The potential of dietary polyunsaturated fatty acids to modulate eicosanoid synthesis and reproduction in <i>Daphnia magna</i> : a gene expression approach                         | Schlotz, N., Sorensen, J. G. and Martin-Creuzburg, D.                                                                                                                                                                                        | 2012 qPCR             | <i>Daphnia magna</i> | Different algae food                                                                                                                                                                                                                                                                                                                                                                                                                                                                                                             |
| Tissue-specific expression of a bHLH-PAS protein homologous to ARNT during the development of crustacean <i>Daphnia magna</i>                                                       | Tokishita, S., Kimura, S., Mandokora, Y., Kato, K., Shiga, Y., Takahashi, Y., Ohta, T. and Yamagata, H.                                                                                                                                      | 2006 qPCR             | <i>Daphnia magna</i> | hypoxia                                                                                                                                                                                                                                                                                                                                                                                                                                                                                                                          |
| Toxicogenomic responses of nanotoxicity in <i>Daphnia magna</i> exposed to silver nitrate and coated silver nanoparticles                                                           | Poynton, H. C., Lazorchak, J. M., Impellitteri, C. A., Blalock, B. J., Rogers, K., Allen, H. J., Loguinov, A., Heckman, J. L. and Govindaswamy, S.                                                                                           | 2012 microarray       | <i>Daphnia magna</i> | Silver nanoparticles                                                                                                                                                                                                                                                                                                                                                                                                                                                                                                             |
| Transcriptional changes during <i>Daphnia pulex</i> development indicate that the maturation decision resembles a rate more than a threshold                                        | Harney, E., Plaistow, S. J. and Paterson, S.                                                                                                                                                                                                 | 2015 microarray       | <i>Daphnia pulex</i> | Developmental Stages                                                                                                                                                                                                                                                                                                                                                                                                                                                                                                             |
| Transcriptional profiling of predator-induced phenotypic plasticity in <i>Daphnia pulex</i>                                                                                         | Rozenberg, A., Parida, M., Leese, F., Weiss, L. C., Tollrian, R. and Manak, J. R.                                                                                                                                                            | 2015 RNA-Seq          | <i>Daphnia pulex</i> | fish kairomones                                                                                                                                                                                                                                                                                                                                                                                                                                                                                                                  |

|                                                                                                                      |                                                                              |              |                        |            |
|----------------------------------------------------------------------------------------------------------------------|------------------------------------------------------------------------------|--------------|------------------------|------------|
| Transcriptomic alterations in <i>Daphnia magna</i> embryos from mothers exposed to hypoxia                           | Lai, K. P., Li, J. W., Chan, C. Y., Chan, T. F., Yuen, K. W. and Chiu, J. M. | 2016 RNA-Seq | <i>Daphnia magna</i>   | hypoxia    |
| De Novo Transcriptome Assembly and Sex-Biased Gene Expression in the Cyclical Parthenogenetic <i>Daphnia galeata</i> | Huylmans, A. K., Lopez Ezquerro, A., Parsch, J. and Cordellier, M.           | 2016 RNA-Seq | <i>Daphnia galeata</i> | sex biased |
